# Supplementary material
Source: publisher figshare collection journal article supplement (https://acs.figshare.com/ndownloader/files/23758486)
Supplement: Supplementary file 1 [file 23758486]

## SUPPLEMENTAL MATERIAL

**Supplementary Table 1** Percentage (%) of each oligosaccharide in products (45 U).

| Oligosaccharide composition         | Percentage (%) |
|-------------------------------------|----------------|
| (LA-G) <sub>1</sub>                 | 40.77          |
| (LA-G) <sub>1</sub> Me              | 6.27           |
| (LA-G) <sub>2</sub>                 | 29.22          |
| (LA-G) <sub>2</sub> Me <sub>1</sub> | 4.35           |
| (LA-G) <sub>2</sub> Me <sub>2</sub> | 4.23           |
| (LA-G) <sub>3</sub>                 | 11.57          |
| (LA-G) <sub>3</sub> Me <sub>1</sub> | 2.12           |
| (LA-G) <sub>3</sub> Me <sub>2</sub> | 1.08           |
| (LA-G) <sub>3</sub> Me <sub>3</sub> | 0.39           |

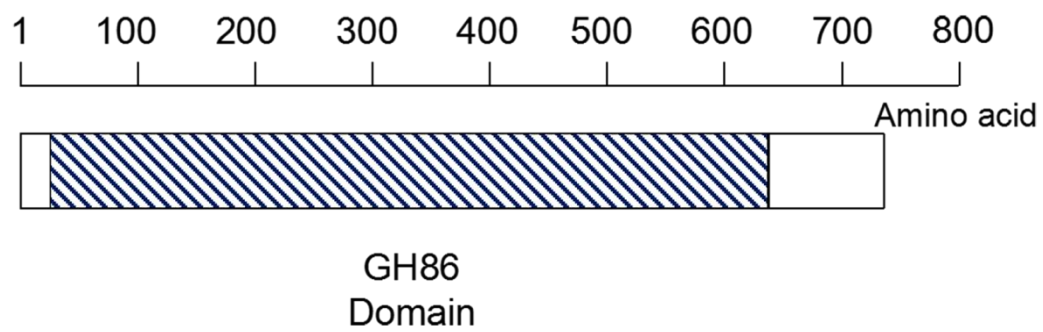

**Fig. S1** A schematic of the modular arrangement of Aga86A\_Wa. The GH86 family glycoside hydrolase catalytic domain (26-637 amino acids) was identified by the dbCAN.

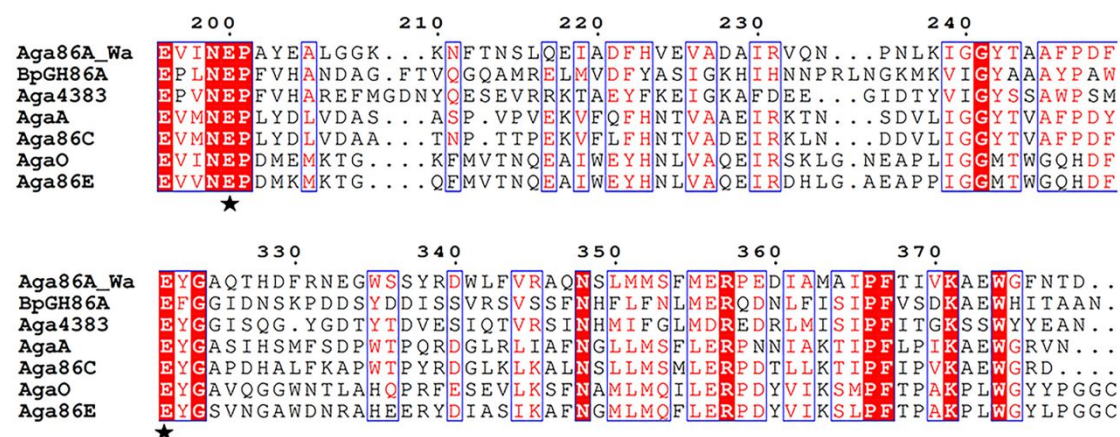

**Fig. S2** Amino acid sequence alignment of Aga86A\_Wa with characterized GH86 family enzymes. Critical catalytic residues were marked by stars.

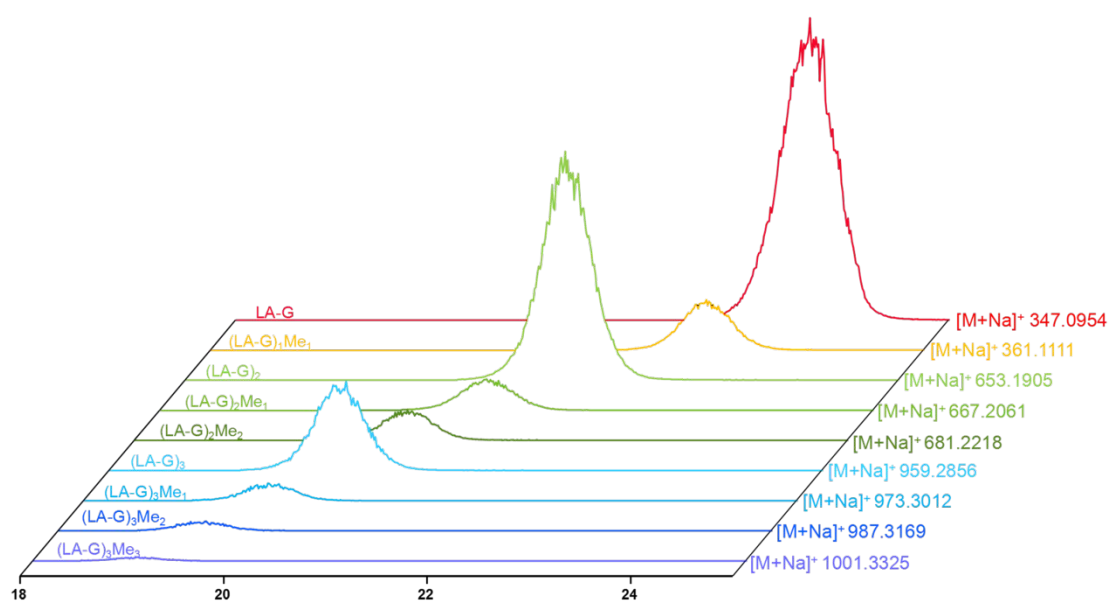

**Fig. S3** Extracted ion chromatograms of oligosaccharides in product obtained with 45U enzyme (Fig, 5). The  $m/z$  and composition of oligosaccharides were annotated to the corresponding curve.

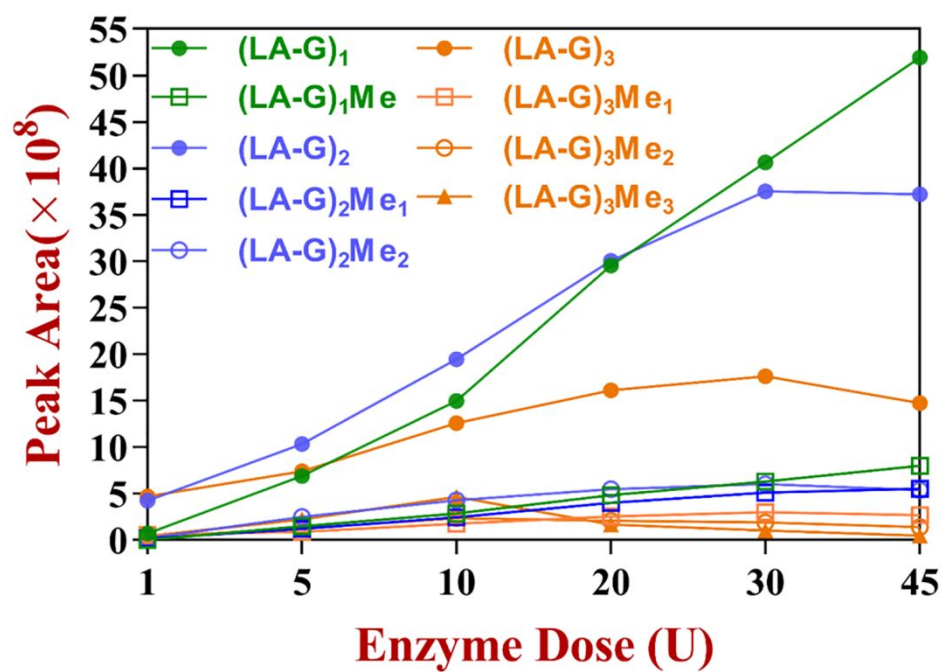

**Fig. S4** Products prepared by 100 mg substrate incubated with different enzyme doses of Aga86A\_Wa at 24 h.

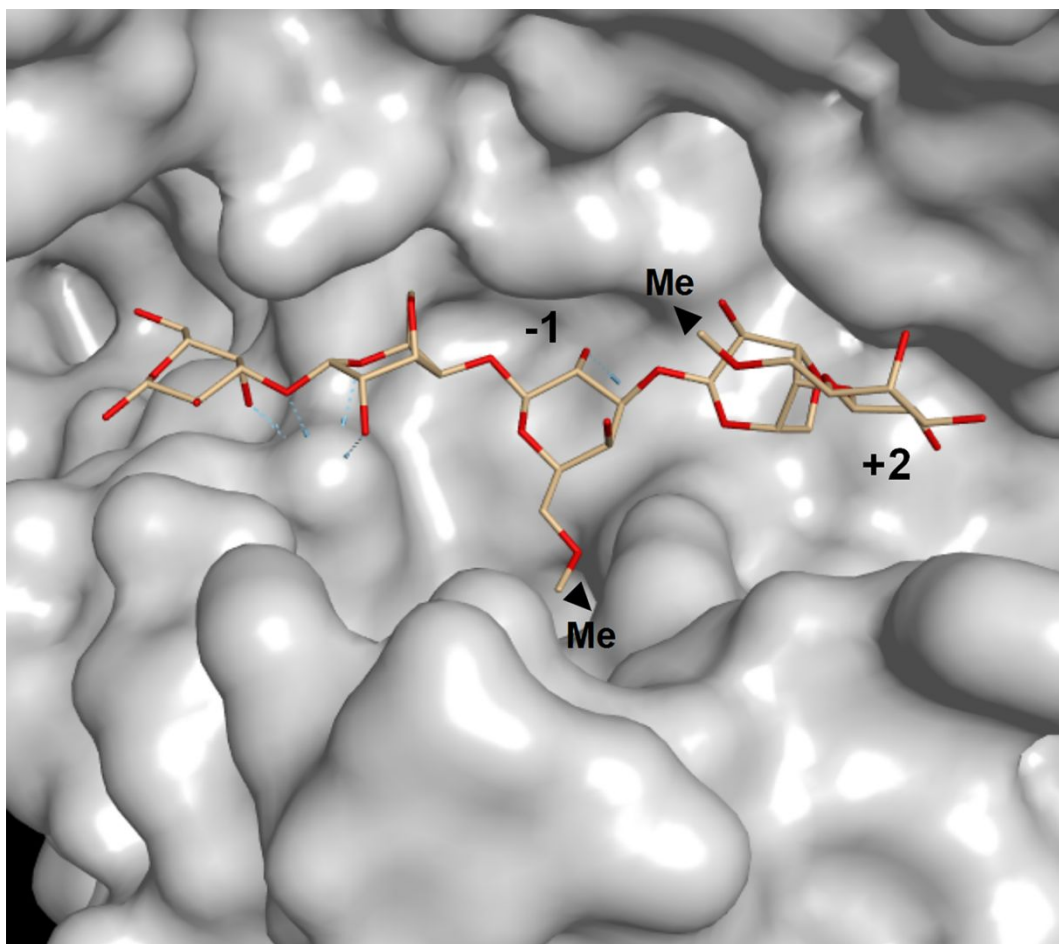

**Fig. S5** Predicted tertiary structure of Aga86A\_Wa superimposed with the ligand in BuGH86 (5TA0). The O-6 positions of G residues at -1 and +2 subsites were modified with methyl groups.
